# Supplementary material
Source: PubMed Central journal article supplement (PMC2686137)
Supplement: blood-2008-09-181107_1.pdf [file blood-2008-09-181107_1.pdf]

| Leukocytes                          |                   |                 |                   |                  |                   |                   |
|-------------------------------------|-------------------|-----------------|-------------------|------------------|-------------------|-------------------|
|                                     | WBC (K/ $\mu$ L)  | NE (K/ $\mu$ L) | LY (K/ $\mu$ L)   | MO (K/ $\mu$ L)  | EO (K/ $\mu$ L)   | BA (K/ $\mu$ L)   |
| STAT5ab <sup>flx/flx</sup>          | 8.85 $\pm$ 2.80   | 2.14 $\pm$ 0.64 | 6.11 $\pm$ 1.76   | 0.47 $\pm$ 0.30  | 0.11 $\pm$ 0.11   | 0.02 $\pm$ 0.025  |
| Mx1-Cre/+STAT5ab <sup>flx/flx</sup> | 4.80 $\pm$ 0.93** | 1.66 $\pm$ 0.40 | 3.00 $\pm$ 0.64** | 0.12 $\pm$ 0.07* | 0.012 $\pm$ 0.007 | 0.003 $\pm$ 0.005 |

| Erythrocytes                        |                   |                  |                  |                |                |                 |
|-------------------------------------|-------------------|------------------|------------------|----------------|----------------|-----------------|
|                                     | RBC (M/ $\mu$ L)  | Hb (g/dL)        | HCT (%)          | MCV (fL)       | MCH (pg)       | RDW (%)         |
| STAT5ab <sup>flx/flx</sup>          | 10.2 $\pm$ 0.40   | 14.3 $\pm$ 0.8   | 53.3 $\pm$ 4.7   | 52.3 $\pm$ 2.8 | 14.1 $\pm$ 1.1 | 19.4 $\pm$ 0.8  |
| Mx1-Cre/+STAT5ab <sup>flx/flx</sup> | 7.51 $\pm$ 0.49** | 10.4 $\pm$ 0.8** | 37.7 $\pm$ 4.7** | 50.1 $\pm$ 3.5 | 14.0 $\pm$ 1.5 | 18.0 $\pm$ 0.7* |

WBC indicates white blood cell count; NE, neutrophil; LY, lymphocyte; MO, monocyte; EO, eosinophil; BA, basophil; RBC, red blood cell count; Hb, hemoglobin; HCT, hematocrit; MCV, mean corpuscular volume; MCH, mean corpuscular hemoglobin; RDW, red blood cell distribution width.

\* $P < 0.05$ , \*\* $P < 0.01$  compared with STAT5ab<sup>flx/flx</sup> and  $n = 6$  for each group.
